# Supplementary material for: Anionic CO2 activation in the anionic and di-anionic state of aza-naphthalene
Source: Royal Society of Chemistry journal article supplement (doi:10.1039/d1ra04202e), 2021-01-01
Supplement: d1ra04202e1.pdf [file d1ra04202e1.pdf]

# Electronic Supplementary Information: Anionic CO<sub>2</sub> activation in the anionic and di-anionic state of aza-naphthalene

Chang Jun Park, One Heo, Hyeon Seok Lee, Kyung Suh Lee, and Sang Hak Lee\*

*Department of Chemistry, Pusan National University, Busan 46241, Korea*

*Email: shlee@pusan.ac.kr*

Figure S1 – S3

Optimized isomers and energetics of TAN-(CO<sub>2</sub>)<sub>n</sub> (*n* = 2 -3) complexes.

Figure S4 –S7

In order to investigate the chemical reactivity with CO<sub>2</sub> molecules as a function of the number of nitrogen atoms in naphthalene, we performed theoretical calculations of the structure and energetics of nitrogen-containing naphthalene molecules in the anionic and dianionic states. As expected, the dianionic states of mono- and di-aza-naphthalene were found to be energetically unstable compared to reference neutral and anionic states. Depending on the position of the nitrogen atoms, the naphthalene molecules react differently to the CO<sub>2</sub> molecules. When nitrogen atoms are not too close to each other, they then react with CO<sub>2</sub> molecules in the anionic and di-anionic states. As for tri-aza-naphthalene, all nitrogen atoms interact with CO<sub>2</sub> molecules in the dianionic state but not in the anionic state.

Table S1 - S2

Table S1 shows the energetics of tetra-aza-naphthalene and CO<sub>2</sub> complexes in the neutral, anionic, and dianionic states.

Table S2 shows the energetics calculated using the various DFT functionals (B3LYP, BP86, and BPBE)

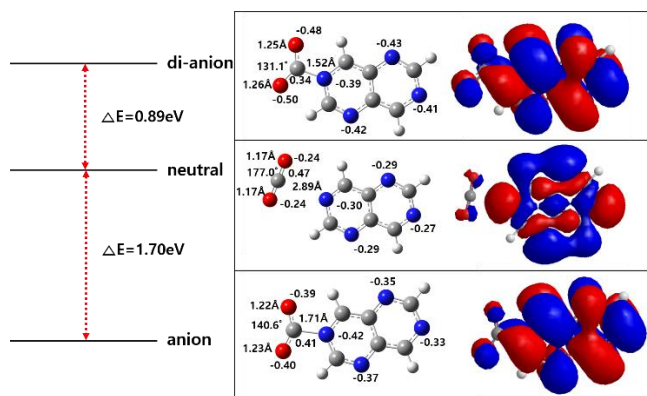

Figure S1. Neutral, anionic, and di-anionic geometries and calculated energies of the 2 & 4 isomer of  $\text{TAN}_1(\text{CO}_2)_1$  optimized at the BP86/6-311g\*\* level

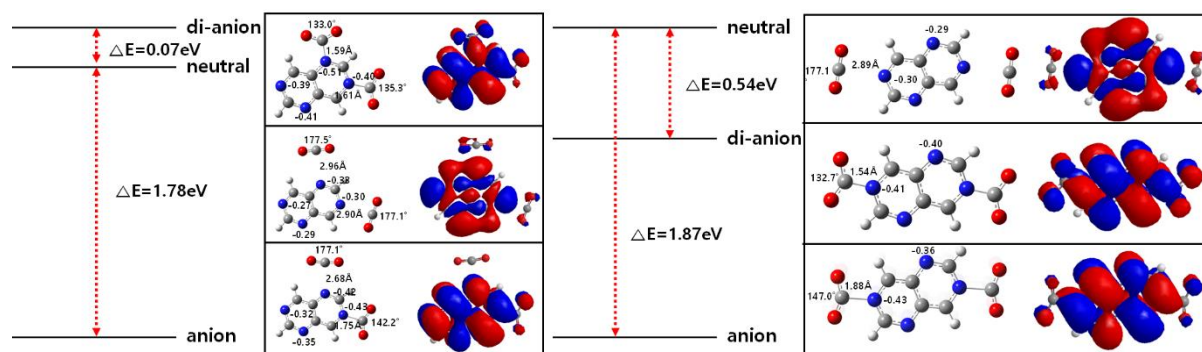

(a)  $\text{CO}_2$  Position : 2, 4

(b)  $\text{CO}_2$  Position : 2, 6

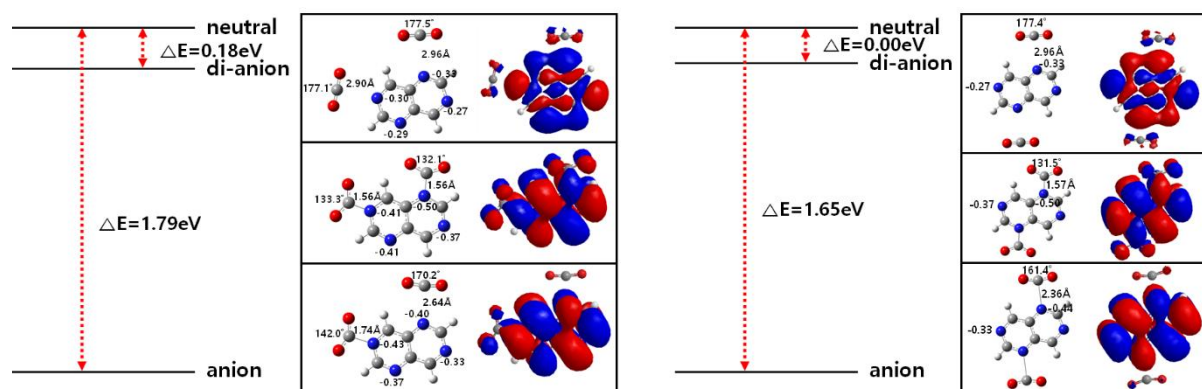

(c)  $\text{CO}_2$  Position : 4, 6

(d)  $\text{CO}_2$  Position : 4, 8

Figure S2. Neutral, anionic, and di-anionic geometries and calculated energies of  $\text{TAN}_1(\text{CO}_2)_2$  optimized at the BP86/6-311g\*\* level

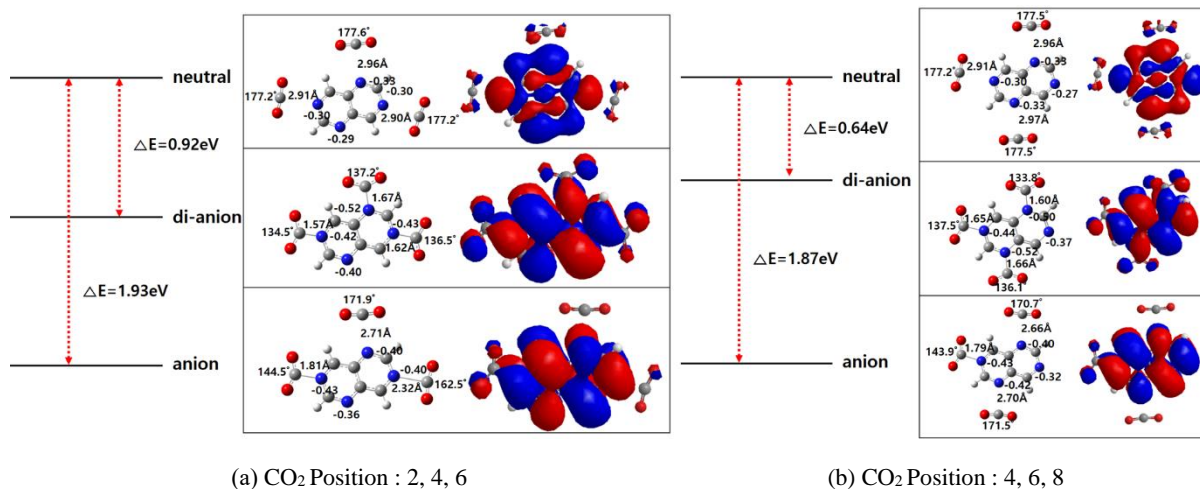

**Figure S3.** Neutral, anionic, and di-anionic geometries and calculated energies of TAN<sub>1</sub>(CO<sub>2</sub>)<sub>3</sub> optimized at the BP86/6-311g\*\* level

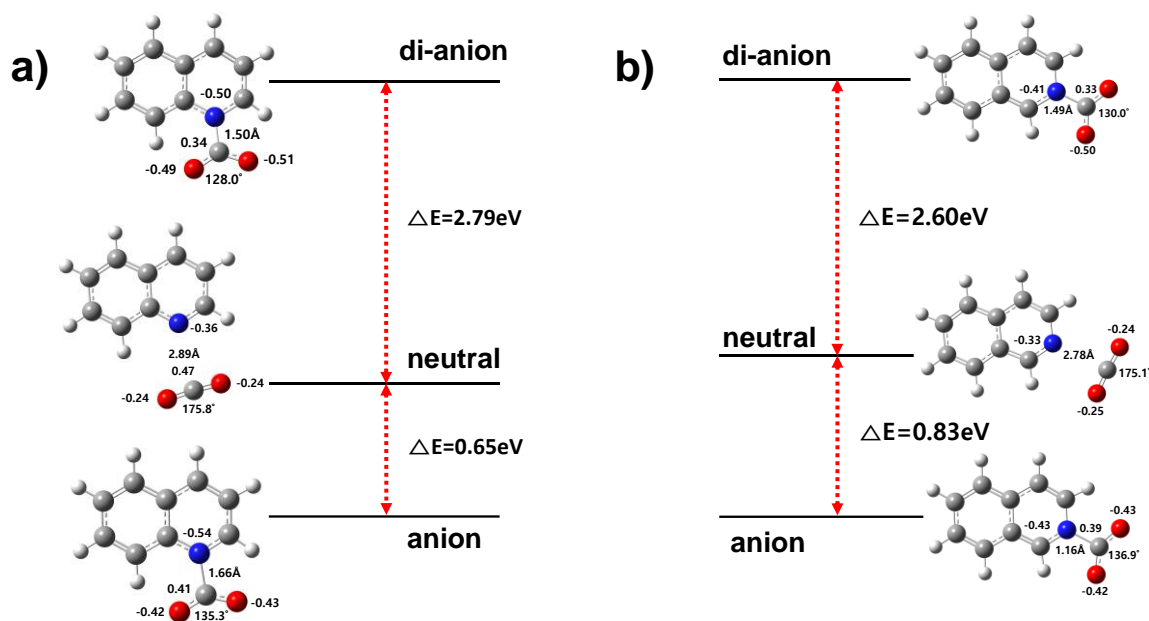

**Figure S4.** Optimized geometries and their energetics of quinoline (a) and iso-quinoline (b) in the neutral, anionic, and di-anionic states.

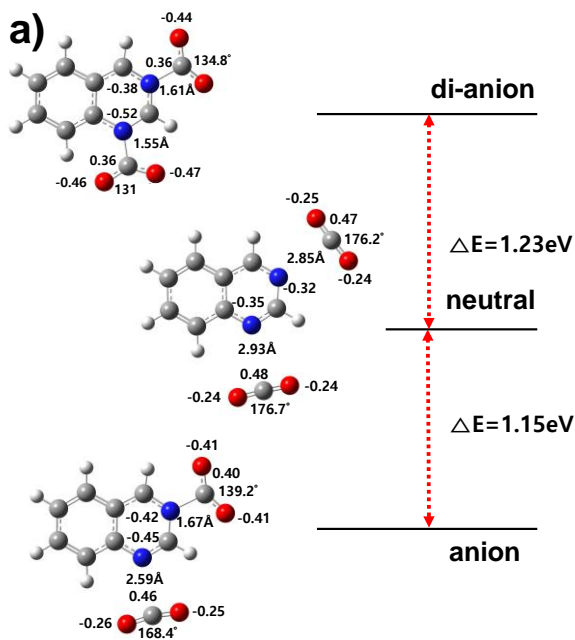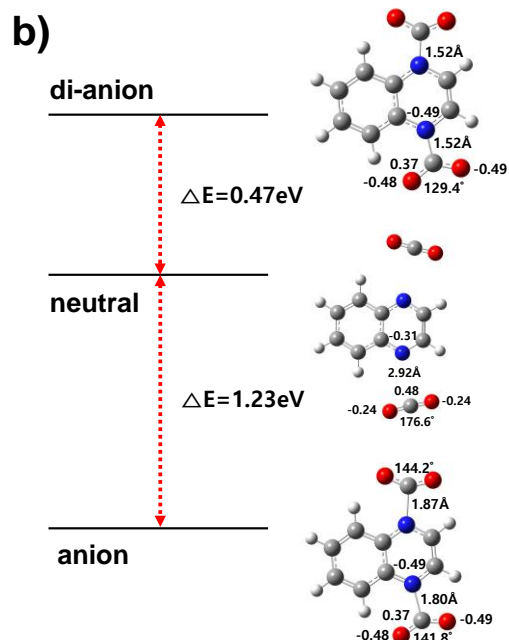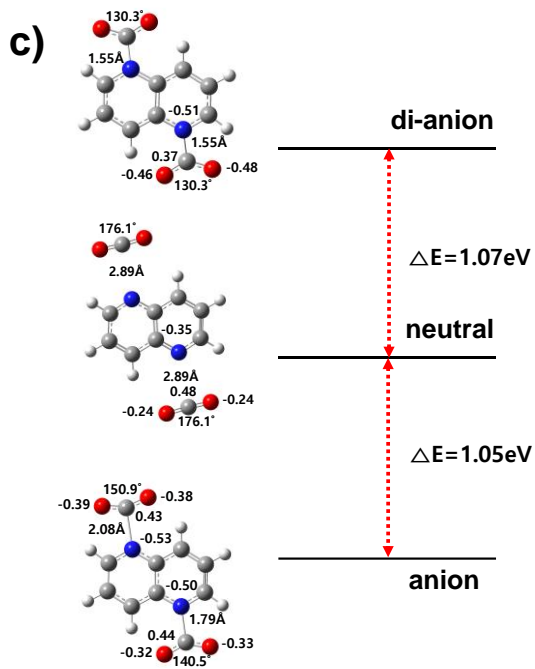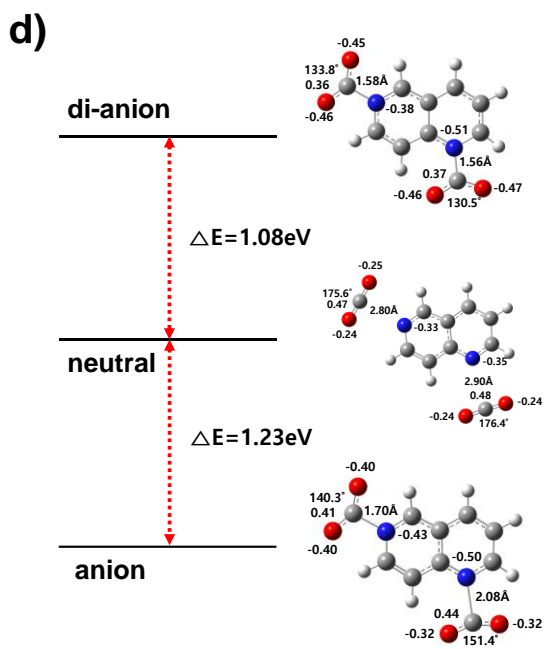

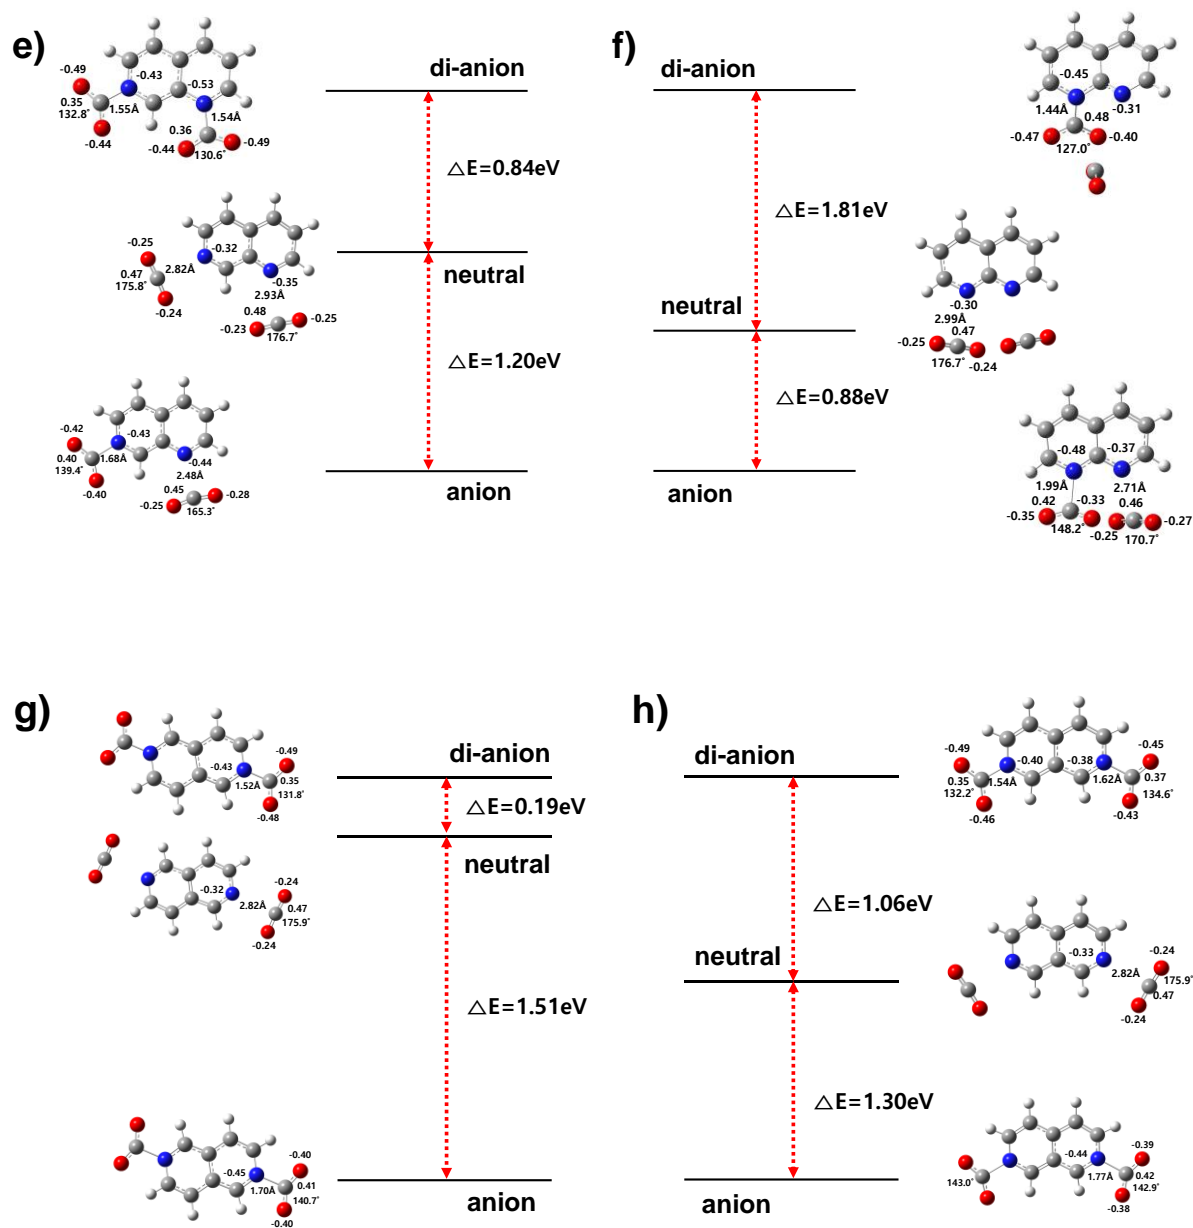

**Figure S5.** Optimized geometries and their energetics of di-azanaphthalene, (a) quinazoline, (b) quinoxaline, (c) 1,5-naphthyridine, (d) 1,6-naphthyridine, (e) 1,7-naphthyridine, (f) 1,8-naphthyridine, (g) 2,6-naphthyridine, (h) 2,7-naphthyridine, in the neutral, anionic, and di-anionic states.

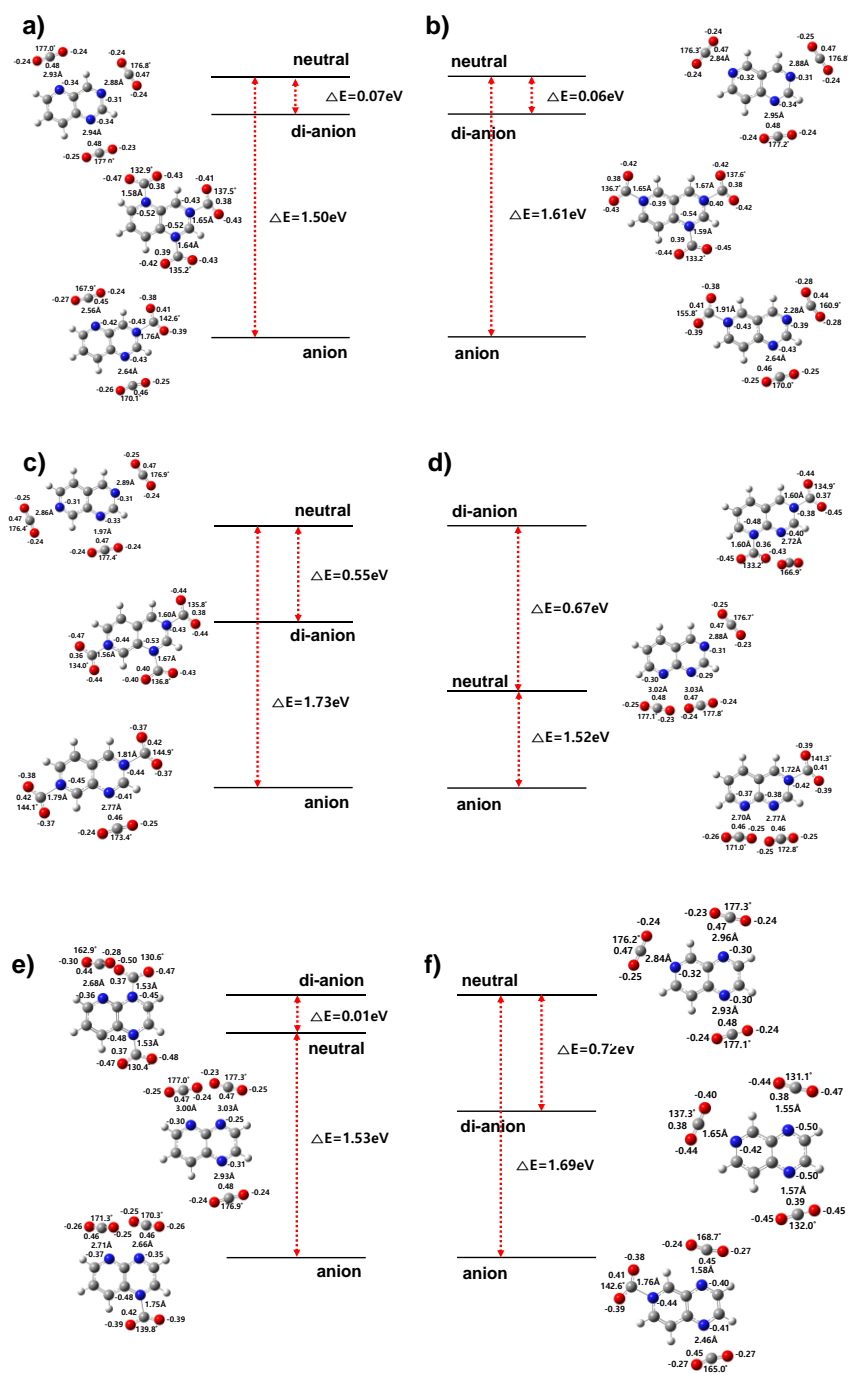

**Figure S6.** Optimized geometries and their energetics of tri-azanaphthalene, (a) pyrido[3,2-d]pyrimidine, (b) pyrido[4,3-d]pyrimidine, (c) pyrido[3,4-d]pyrimidine, (d) pyrido[2,3-d]pyrimidine, (e) pyrido[3,2-b]pyrazine, (f) pyrido[3,4-b]pyrazine, in the neutral, anionic, and di-anionic states.

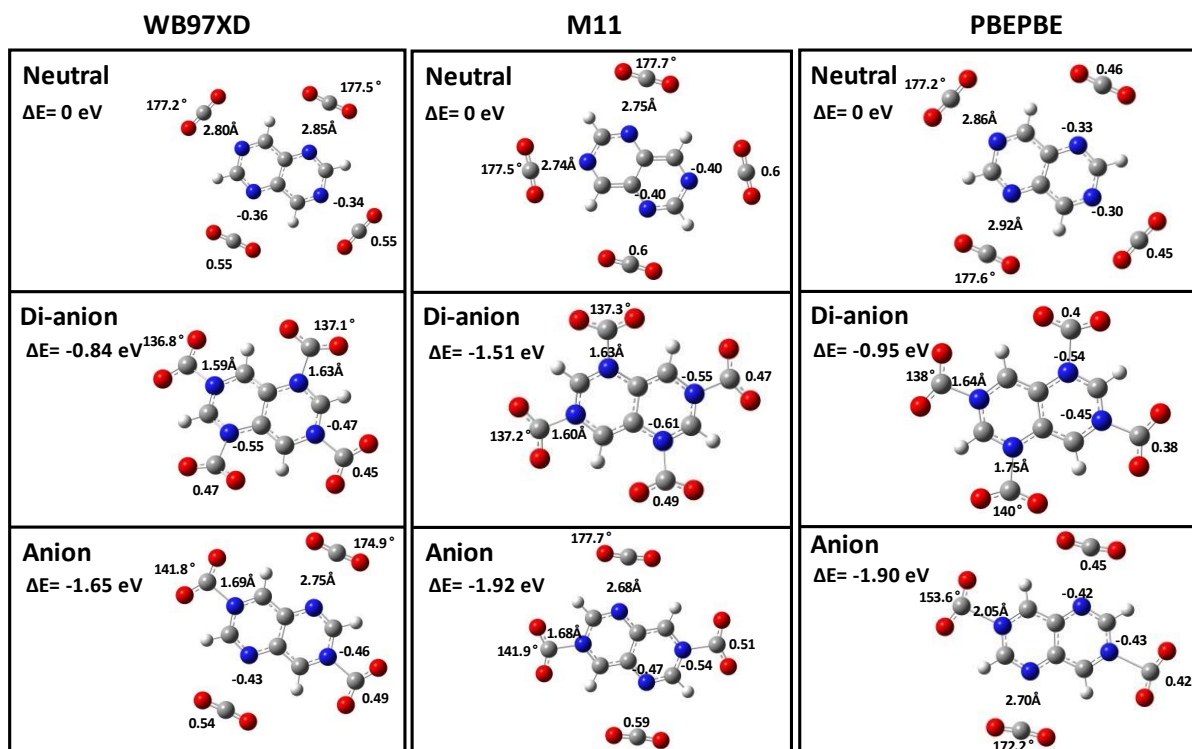

**Figure S7.** Optimized geometries and their energetics of  $\text{TAN}_1(\text{CO}_2)_4$  optimized using various DFT functionals: WB97XD, M11, PBEPBE with 6-311G\*\* basis set.

**Table S1.** Calculated Energies of Tetraazanaphthalene-(CO<sub>2</sub>)<sub>n</sub> Complexes<sup>b</sup>

|                                                  | CO <sub>2</sub> position |       | Anoin (ΔE) | Di-anion (ΔE) |
|--------------------------------------------------|--------------------------|-------|------------|---------------|
| TAN <sub>1</sub>                                 | -                        | BP86  | 1.32       | -2.73         |
|                                                  |                          | BPBE  | 1.20       | -2.98         |
|                                                  |                          | B3LYP | 1.13       | -3.12         |
| TAN <sub>1</sub> (CO <sub>2</sub> ) <sub>1</sub> | 4                        | BP86  | 1.54       | -1.06         |
|                                                  |                          | BPBE  | 1.37       | -1.37         |
|                                                  |                          | B3LYP | 1.27       | -1.46         |
|                                                  | 6                        | BP86  | 1.70       | -0.89         |
|                                                  |                          | BPBE  | 1.53       | -1.18         |
|                                                  |                          | B3LYP | 1.43       | -1.26         |
| TAN <sub>1</sub> (CO <sub>2</sub> ) <sub>2</sub> | 2, 4                     | BP86  | 1.78       | -0.07         |
|                                                  |                          | BPBE  | 1.60       | -0.43         |
|                                                  |                          | B3LYP | 1.45       | -0.56         |
|                                                  | 2, 6                     | BP86  | 1.87       | 0.54          |
|                                                  |                          | BPBE  | 1.66       | 0.20          |
|                                                  |                          | B3LYP | 1.45       | 0.15          |
|                                                  | 4, 6                     | BP86  | 1.79       | 0.18          |
|                                                  |                          | BPBE  | 1.61       | -0.17         |
|                                                  |                          | B3LYP | 1.45       | -0.25         |
|                                                  | 4, 8                     | BP86  | 1.65       | 0.00          |
|                                                  |                          | BPBE  | 1.46       | -0.36         |
|                                                  |                          | B3LYP | 1.40       | -0.45         |
| TAN <sub>1</sub> (CO <sub>2</sub> ) <sub>3</sub> | 2, 4, 6                  | BP86  | 1.93       | 0.92          |
|                                                  |                          | BPBE  | 1.72       | 0.52          |
|                                                  |                          | B3LYP | 1.60       | 0.31          |
|                                                  | 4, 6, 8                  | BP86  | 1.87       | 0.64          |
|                                                  |                          | BPBE  | 1.67       | 0.23          |
|                                                  |                          | B3LYP | 1.56       | 0.08          |
| TAN <sub>1</sub> (CO <sub>2</sub> ) <sub>4</sub> | 2, 4, 6, 8               | BP86  | 2.00       | 1.13          |
|                                                  |                          | BPBE  | 1.77       | 0.69          |
|                                                  |                          | B3LYP | 1.71       | 0.46          |

<sup>b</sup>All energies in eV. Calculated energies were obtained at the BP86, BPBE, B3LYP/6-311g\*\* level.

**Table S2.** Calculated Energies of Tetraazanaphthalene-(CO<sub>2</sub>)<sub>n</sub> Complexes<sup>a</sup>

|                          | TAN <sub>1</sub> | TAN <sub>1</sub> (CO <sub>2</sub> ) <sub>1</sub> |       | TAN <sub>1</sub> (CO <sub>2</sub> ) <sub>2</sub> |      |      |      | TAN <sub>1</sub> (CO <sub>2</sub> ) <sub>3</sub> |         | TAN <sub>1</sub> (CO <sub>2</sub> ) <sub>4</sub> |
|--------------------------|------------------|--------------------------------------------------|-------|--------------------------------------------------|------|------|------|--------------------------------------------------|---------|--------------------------------------------------|
| CO <sub>2</sub> position | -                | 4                                                | 6     | 2, 4                                             | 2, 6 | 4, 6 | 4, 8 | 2, 4, 6                                          | 4, 6, 8 | 2, 4, 6, 8                                       |
| Anoin (ΔE)               | 1.32             | 1.54                                             | 1.70  | 1.78                                             | 1.87 | 1.79 | 1.65 | 1.93                                             | 1.87    | 2.00                                             |
| Di-anion (ΔE)            | -2.73            | -1.06                                            | -0.89 | -0.07                                            | 0.54 | 0.18 | 0.00 | 0.92                                             | 0.64    | 1.13                                             |

<sup>a</sup>All energies in eV. Calculated energies were obtained at the BP86/6-311g\*\* level.
